# Supplementary material for: Core–shell Co@C catalyzed MgH2: enhanced dehydrogenation properties and its catalytic mechanism
Source: Royal Society of Chemistry journal article supplement (doi:10.1039/c4ta02759k), 2014-01-01
Supplement: c4ta02759k1.pdf [file c4ta02759k1.pdf]

### Supporting Information

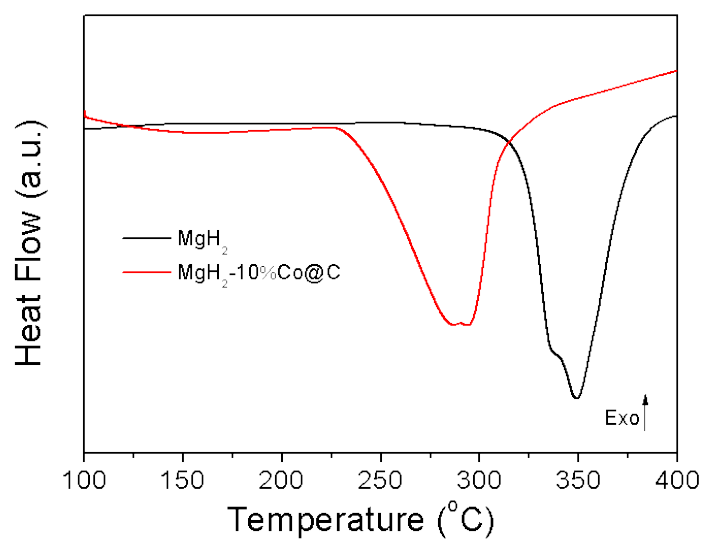

**Figure S1** The representative DSC curves of pure MgH<sub>2</sub> and MgH<sub>2</sub>-10%Co@C samples (Ramp: 5 °C min<sup>-1</sup>).

**Table S1** Peak temperature and  $E_a$  for desorption of pure  $MgH_2$  and  $MgH_2$ -10%Co@C samples.

| <b>Sample Name</b> | <b>Peak Temperature (°C)</b> |                           |                            |                            | <b><math>E_a</math><br/>(kJ/mol)</b> |
|--------------------|------------------------------|---------------------------|----------------------------|----------------------------|--------------------------------------|
|                    | 2 (°C min <sup>-1</sup> )    | 5 (°C min <sup>-1</sup> ) | 10 (°C min <sup>-1</sup> ) | 15 (°C min <sup>-1</sup> ) |                                      |
| $MgH_2$            | 340.7                        | 359.3                     | 374.5                      | 380.6                      | 157.1                                |
| $MgH_2$ -10%Co@C   | 293.8                        | 316.1                     | 339.4                      | 353.3                      | 84.5                                 |

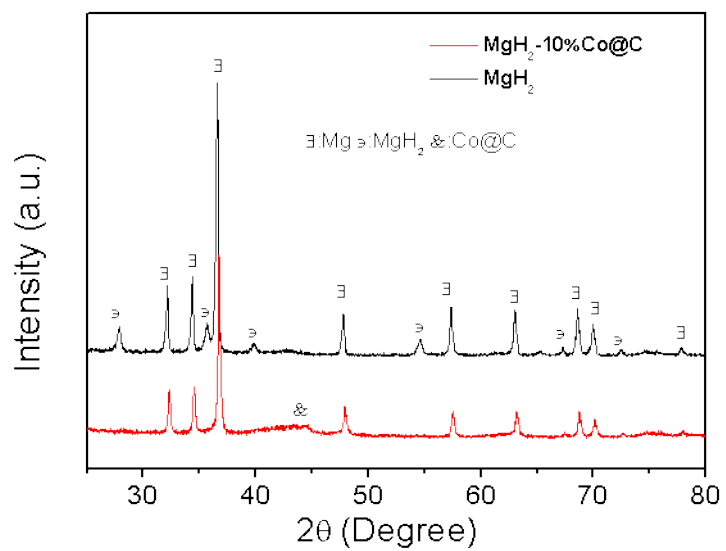

**Figure S2** XRD images of pure MgH<sub>2</sub> and MgH<sub>2</sub>-10%Co@C after dehydrogenation.

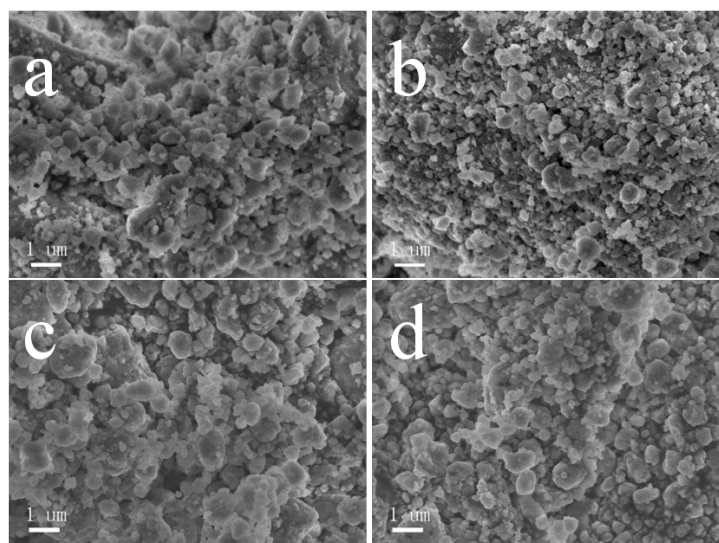

**Figure S3** SEM images of pure  $\text{MgH}_2$  and  $\text{MgH}_2$ -10%Co@C composites (a, b) as-milled, (c, d) after-dehydrogenated.
